# Supplementary material for: Epidermal growth factor suppresses intestinal epithelial cell shedding via a MAPK dependent pathway.
Source: Oxford University Press journal article supplement (doi:10.1242/jcs.182584), 2016-01-01
Supplement: jcs182584supp.pdf [file jcs182584supp.pdf]

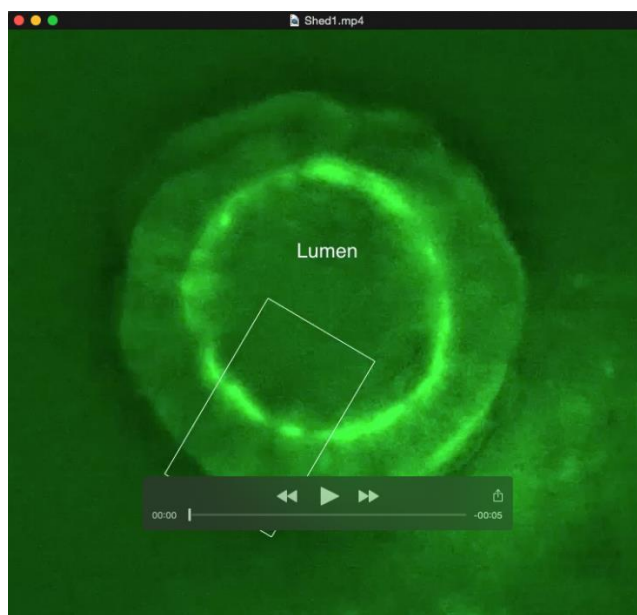

Movie 1. Ileal enteroids isolated from Lifact-EGFP-expressing mice were live-imaged for 24 h to view cell shedding in real time. Box encloses an area in which an example shedding event occurs.
